# Supplementary material for: Prediction of the ferrovalley property with sizable valley splitting in Janus monolayer GdBrI
Source: Royal Society of Chemistry journal article supplement (doi:10.1039/d2cp04344k), 2022-01-01
Supplement: d2cp04344k1.pdf [file d2cp04344k1.pdf]

*Supplementary Information for*

**Prediction of ferrovalley property with sizable valley splitting in Janus monolayer GdBrI**

Jianping Zhang,<sup>†</sup> Yaping Wang,<sup>‡</sup> Qian Xia,<sup>†</sup> Miaojuan Ren,<sup>†</sup> Peiji Wang,<sup>†</sup> Changwen Zhang,<sup>†</sup> Shengshi Li,<sup>†\*</sup> Weixiao Ji<sup>†\*</sup>

<sup>†</sup> *Spintronics Institute, School of Physics and Technology, University of Jinan, Jinan, 250022, China.*

<sup>‡</sup> *State Key Lab of Crystal Materials and Institute of Crystal Materials, Shandong University, Jinan 250100, China.*

\* Corresponding authors

E-mail: [sdy\\_liss@ujn.edu.cn](mailto:sdy_liss@ujn.edu.cn)

E-mail: [hellojiweixiao@163.com](mailto:hellojiweixiao@163.com).

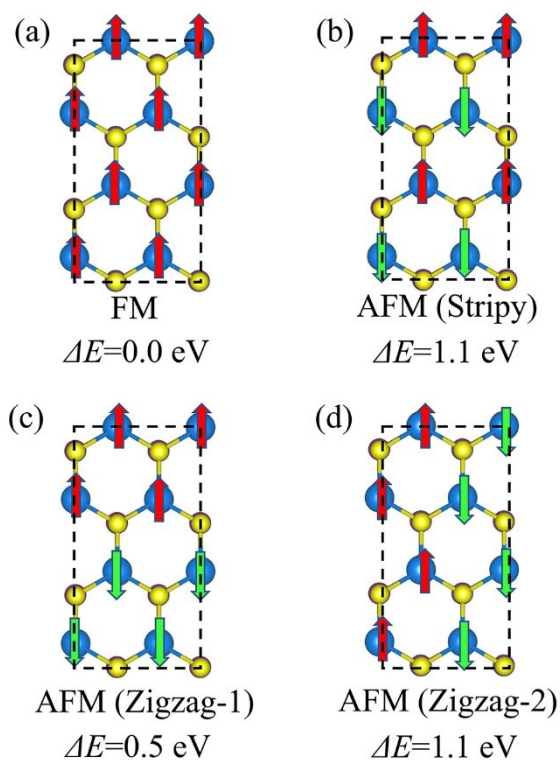

**Fig. S1** Diagrammatic sketches and relative energies of the FM configuration and three AFM configurations for the monolayer GdBrI.

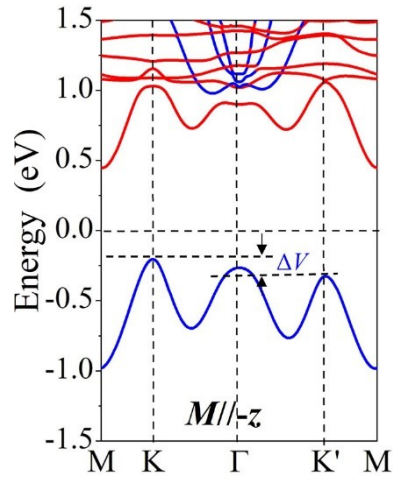

**Fig. S2** Calculated SOC band structure of the GdBrI with magnetization orientation along the  $-z$  direction.

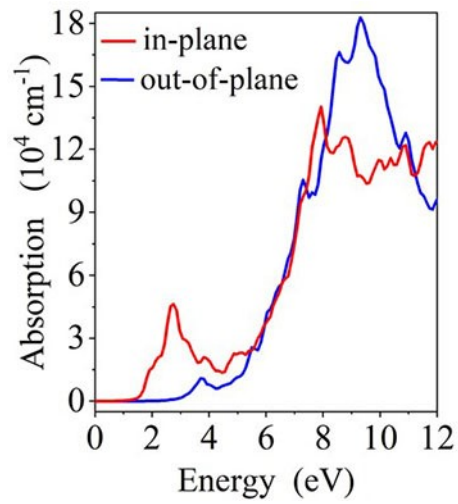

**Fig. S3** Optical absorption spectrum obtained using HSE06 functional for the monolayer GdBrI.
